# Supplementary material
Source: PubMed Central journal article supplement (PMC3992654)
Supplement: 1320178111_pnas.201320178SI.pdf [file 1320178111_pnas.201320178SI.pdf]

# Supporting Information

Anderson et al. 10.1073/pnas.1320178111

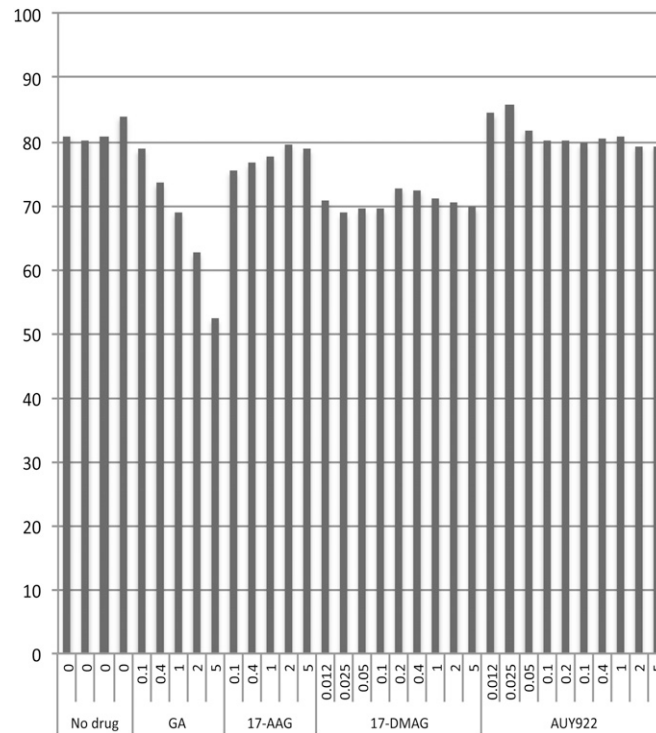

**Fig. S1.** J-Lat cells were stimulated by TPA (5 nM) for 24 h in the presence of the indicated compounds (μM) and analyzed by flow cytometry. Cells that did not fall within the forward/side scatter gate established for untreated (no Hsp90 inhibitors) cells were considered dead. 17-AAG, 17-(N-allylamino)-17-demethoxygeldanamycin; 17-DMAG, 17-Dimethylaminoethylamino-17-demethoxygeldanamycin; TPA, 12-O-tetradecanoylphorbol-13-acetate.

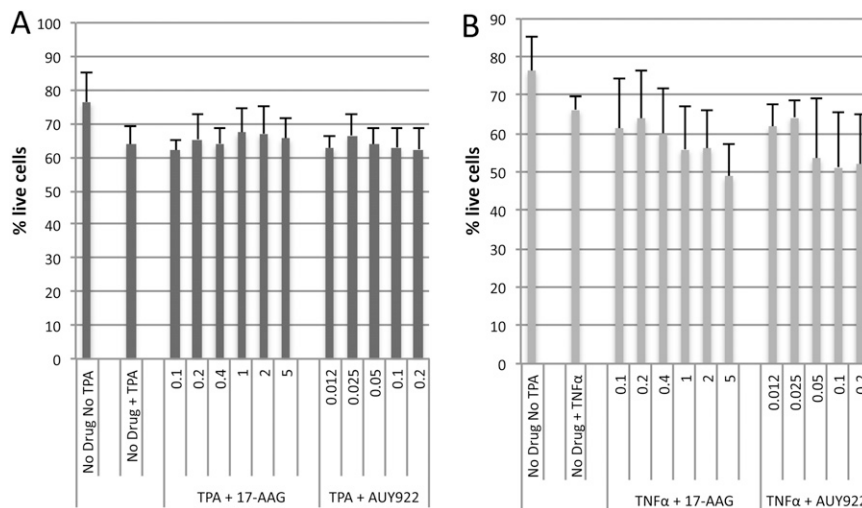

**Fig. S2.** J-Lat cells were stimulated by (A) TPA (5 nM) or (B) TNFα (5 ng/mL) for 24 h in the presence of the indicated compounds (μM) and analyzed by flow cytometry. Cells that did not fall within the forward/side scatter gate established for untreated (no Hsp90 inhibitors) cells were considered dead.

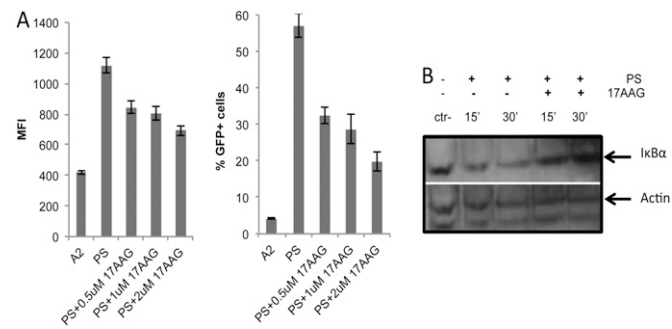

**Fig. 53.** (A) J-Lat cells were stimulated with prostratin (PS) (50 nM) for 24 h in the presence of the indicated concentrations of 17-AAG and analyzed by flow cytometry. Bars show average values  $\pm$  SD,  $n = 3$ . (B) Cells were stimulated with PS (50 nM) for 15 or 30 min in the presence of 17-AAG (2  $\mu$ M) and analyzed by Western blot with an antibody against I $\kappa$ B $\alpha$ .
